# Supplementary material for: Prevalence and correlates of substance use among health care students in Nepal: a cross sectional study
Source: Springer Nature journal article supplement (doi:10.1186/s12889-017-4980-6), 2017-12-01
Supplement: MOESM2 [file 15301610]

## Health Professional Questionnaire 2010

Please answer the following questions by tick mark (✓) or a cross (X) with a dark pen. Record your best guess if no answer fits the question exactly. We realize that certain portions of this survey ask questions of a sensitive nature. You do not need to fear about this as the result of this survey will be anonymous and confidential. Your honest answers are requested. Please don't put your name in the questionnaire.

Section: A

1. Age (years): .....

2. Gender:  1. Male  2. Female

3. University of study:..... Faculty:.....

4. Course you are currently undertaking:  1. Bachelor  3. PhD  
 2. Masters  4. Other (please specify).....

5. Year of study:  1. First  2. Second  3. Third  4. Fourth  5. Others:.....

6. Do you actively participate in religion? (eg praying, meditation, spirituality, worship)  1. Yes  2. No

7. Which of the following best describes your practice of prayer or religious meditation? (answer only one):  
 1. No influence  2. A small amount  3. Some  4. A fair amount  5. Strong influence

8. Which of the following statements comes closest to your belief about God? (answer only one):  
 1. I am sure God really exists and is active in my life  
 2. Although I sometimes question God's existence, I believe in God and believe he knows me as a person  
 3. I don't know if there is personal God, but I believe in a higher power of some kind  
 4. I don't know if there is personal God or a higher power of some kind, and I don't know if I will ever know  
 5. I don't believe in personal God or in higher power

9. Religion gives me a great amount of comfort and security in life:  
 1. I strongly disagree  2. I disagree  3. I am uncertain  4. I agree  5. I strongly agree

10. Do you think any of your family members has/had an alcohol abuse problem?  1. Yes  2. No

11. Do you think any of your family members has/had a drug abuse problem?  1. Yes  2. No

| 12. Please consider the number of times the following may have occurred to you during the past year:                                              | Never                    | Seldom<br>1 or 2 times   | Occasionally<br>3 to 5 times | Sometimes<br>6 to 9 times | Often<br>10 or more times |
|---------------------------------------------------------------------------------------------------------------------------------------------------|--------------------------|--------------------------|------------------------------|---------------------------|---------------------------|
| a. How many times in the past year has a friend or colleague given, bought or offered you and alcoholic beverage?                                 | <input type="checkbox"/> | <input type="checkbox"/> | <input type="checkbox"/>     | <input type="checkbox"/>  | <input type="checkbox"/>  |
| b. How many times in the past year has alcohol been given, bought or offered to you at seminars or dinners sponsored by pharmaceutical companies? | <input type="checkbox"/> | <input type="checkbox"/> | <input type="checkbox"/>     | <input type="checkbox"/>  | <input type="checkbox"/>  |
| c. How many times during the past year has a friend given you or offered you a legal psychotherapeutic drug (eg opiates, stimulants)              | <input type="checkbox"/> | <input type="checkbox"/> | <input type="checkbox"/>     | <input type="checkbox"/>  | <input type="checkbox"/>  |
| d. How often during the past year have you worked with a co-worker or colleague who condoned or accepted self medication with psychoactive drugs? | <input type="checkbox"/> | <input type="checkbox"/> | <input type="checkbox"/>     | <input type="checkbox"/>  | <input type="checkbox"/>  |

# Health Professional Questionnaire 2010

13.  
a. I consider myself a:
- |                                                |                                              |
|------------------------------------------------|----------------------------------------------|
| <input type="checkbox"/> 1. Non drinker        | <input type="checkbox"/> 4. Moderate drinker |
| <input type="checkbox"/> 2. Infrequent drinker | <input type="checkbox"/> 5. Heavy drinker    |
| <input type="checkbox"/> 3. Light drinker      | <input type="checkbox"/> 6. Problem drinker  |

- b. During past year, in a typical week, on how many days did you have AT LEAST 1 DRINK containing ALCOHOL?
- |                                 |                                 |
|---------------------------------|---------------------------------|
| <input type="checkbox"/> 0 Days | <input type="checkbox"/> 4 Days |
| <input type="checkbox"/> 1 Day  | <input type="checkbox"/> 5 Days |
| <input type="checkbox"/> 2 Days | <input type="checkbox"/> 6 Days |
| <input type="checkbox"/> 3 Days | <input type="checkbox"/> 7 Days |

- c. Please indicate the average number of drinks in one sitting during the past year

- |                            |                            |                            |
|----------------------------|----------------------------|----------------------------|
| <input type="checkbox"/> 0 | <input type="checkbox"/> 3 | <input type="checkbox"/> 6 |
| <input type="checkbox"/> 1 | <input type="checkbox"/> 4 | <input type="checkbox"/> 7 |
| <input type="checkbox"/> 2 | <input type="checkbox"/> 5 | <input type="checkbox"/> 8 |

# Health Professional Questionnaire 2010

## Section: B

**1. Please indicate when, if ever, you first used the following substances without a prescription or for use other than intended. (See examples for each medication/drug class for reference)**

|                                                                                                              | Never Tried              | Before College           | During College           |
|--------------------------------------------------------------------------------------------------------------|--------------------------|--------------------------|--------------------------|
| a. Alcohol (includes all forms)                                                                              | <input type="checkbox"/> | <input type="checkbox"/> | <input type="checkbox"/> |
| b. Cigarettes (includes all tobacco products i.e. cigar, pipes etc)                                          | <input type="checkbox"/> | <input type="checkbox"/> | <input type="checkbox"/> |
| c. Marijuana (includes Hashish, THC, etc)                                                                    | <input type="checkbox"/> | <input type="checkbox"/> | <input type="checkbox"/> |
| d. Cocaine (includes all forms, manufactured, and all street acquired forms of cocaine, etc)                 | <input type="checkbox"/> | <input type="checkbox"/> | <input type="checkbox"/> |
| e. Designer drugs (includes Ecstasy, GHB etc.)                                                               | <input type="checkbox"/> | <input type="checkbox"/> | <input type="checkbox"/> |
| f. Hallucinogens (includes LSD, PCP etc)                                                                     | <input type="checkbox"/> | <input type="checkbox"/> | <input type="checkbox"/> |
| g. Major opiates (includes Fentanyl, Morphine etc)                                                           | <input type="checkbox"/> | <input type="checkbox"/> | <input type="checkbox"/> |
| h. Minor opiates (includes Paracetamol with codeine, Paracetamol with Hydrocodone, Codeine cough syrups etc) | <input type="checkbox"/> | <input type="checkbox"/> | <input type="checkbox"/> |
| i. Stimulants (includes Methamphetamine)                                                                     | <input type="checkbox"/> | <input type="checkbox"/> | <input type="checkbox"/> |
| j. Non narcotics Analgesics                                                                                  | <input type="checkbox"/> | <input type="checkbox"/> | <input type="checkbox"/> |
| k. Anxiolytics (includes Diazepam, Lorazepam, Alprazolam etc)                                                | <input type="checkbox"/> | <input type="checkbox"/> | <input type="checkbox"/> |
| l. Sedative Hypnotics (includes Temazepam, Flurazepam, Zolpidem etc)                                         | <input type="checkbox"/> | <input type="checkbox"/> | <input type="checkbox"/> |
| m. Inhalants (includes Nitrous Oxide, Amyl Nitrate, Butyl Nitrate, Halothane etc)                            | <input type="checkbox"/> | <input type="checkbox"/> | <input type="checkbox"/> |
| n. Antibiotics (includes Amoxicillin, Metronidazole etc.)                                                    | <input type="checkbox"/> | <input type="checkbox"/> | <input type="checkbox"/> |
| o. Antidepressants (includes Fluoxetine, Amoxapine, Imipramine etc)                                          | <input type="checkbox"/> | <input type="checkbox"/> | <input type="checkbox"/> |
| p. Tranquilizers (includes Phenobarbital, Ketamine etc)                                                      | <input type="checkbox"/> | <input type="checkbox"/> | <input type="checkbox"/> |
| q. Other prescription pain medicines (includes Tramadol, Butorphanol Pentazocine etc)                        | <input type="checkbox"/> | <input type="checkbox"/> | <input type="checkbox"/> |

**2. a. How many times, if ever, have you had 5 or more drinks on the occasion?**

|                    | TIMES                    |                          |                          |                          |                          |                          |
|--------------------|--------------------------|--------------------------|--------------------------|--------------------------|--------------------------|--------------------------|
|                    | 0                        | 1-4                      | 5-10                     | 11-19                    | 20-30                    | >30                      |
| In your lifetime?  | <input type="checkbox"/> | <input type="checkbox"/> | <input type="checkbox"/> | <input type="checkbox"/> | <input type="checkbox"/> | <input type="checkbox"/> |
| In the past year?  | <input type="checkbox"/> | <input type="checkbox"/> | <input type="checkbox"/> | <input type="checkbox"/> | <input type="checkbox"/> | <input type="checkbox"/> |
| In the past month? | <input type="checkbox"/> | <input type="checkbox"/> | <input type="checkbox"/> | <input type="checkbox"/> | <input type="checkbox"/> | <input type="checkbox"/> |

**b. Please indicate when you first had 5 or more drinks at one time:**

Never  
 Before College  
 After College

**3. a. How many times, if ever, have you smoked cigarettes?**

|                    | TIMES                    |                          |                          |                          |                          |                          |
|--------------------|--------------------------|--------------------------|--------------------------|--------------------------|--------------------------|--------------------------|
|                    | 0                        | 1-4                      | 5-10                     | 11-19                    | 20-30                    | >30                      |
| In your lifetime?  | <input type="checkbox"/> | <input type="checkbox"/> | <input type="checkbox"/> | <input type="checkbox"/> | <input type="checkbox"/> | <input type="checkbox"/> |
| In the past year?  | <input type="checkbox"/> | <input type="checkbox"/> | <input type="checkbox"/> | <input type="checkbox"/> | <input type="checkbox"/> | <input type="checkbox"/> |
| In the past month? | <input type="checkbox"/> | <input type="checkbox"/> | <input type="checkbox"/> | <input type="checkbox"/> | <input type="checkbox"/> | <input type="checkbox"/> |

**b. Number of cigarettes smoked daily:**

0/Never       11-20       41-60  
 1-10       21-40       >60

**4. How many times, if ever, have you smoked marijuana or hashish?**

|                    | TIMES                    |                          |                          |                          |                          |                          |
|--------------------|--------------------------|--------------------------|--------------------------|--------------------------|--------------------------|--------------------------|
|                    | 0                        | 1-4                      | 5-10                     | 11-19                    | 20-30                    | >30                      |
| In your lifetime?  | <input type="checkbox"/> | <input type="checkbox"/> | <input type="checkbox"/> | <input type="checkbox"/> | <input type="checkbox"/> | <input type="checkbox"/> |
| In the past year?  | <input type="checkbox"/> | <input type="checkbox"/> | <input type="checkbox"/> | <input type="checkbox"/> | <input type="checkbox"/> | <input type="checkbox"/> |
| In the past month? | <input type="checkbox"/> | <input type="checkbox"/> | <input type="checkbox"/> | <input type="checkbox"/> | <input type="checkbox"/> | <input type="checkbox"/> |

**5. How many times, if ever, have you used cocaine or its derivatives?**

|                    | TIMES                    |                          |                          |                          |                          |                          |
|--------------------|--------------------------|--------------------------|--------------------------|--------------------------|--------------------------|--------------------------|
|                    | 0                        | 1-4                      | 5-10                     | 11-19                    | 20-30                    | >30                      |
| In your lifetime?  | <input type="checkbox"/> | <input type="checkbox"/> | <input type="checkbox"/> | <input type="checkbox"/> | <input type="checkbox"/> | <input type="checkbox"/> |
| In the past year?  | <input type="checkbox"/> | <input type="checkbox"/> | <input type="checkbox"/> | <input type="checkbox"/> | <input type="checkbox"/> | <input type="checkbox"/> |
| In the past month? | <input type="checkbox"/> | <input type="checkbox"/> | <input type="checkbox"/> | <input type="checkbox"/> | <input type="checkbox"/> | <input type="checkbox"/> |

**6. How many times, if ever, have you used designer drugs or hallucinogens (eg Ecstasy, GHB, LSD, Mescaline etc)?**

|                    | TIMES                    |                          |                          |                          |                          |                          |
|--------------------|--------------------------|--------------------------|--------------------------|--------------------------|--------------------------|--------------------------|
|                    | 0                        | 1-4                      | 5-10                     | 11-19                    | 20-30                    | >30                      |
| In your lifetime?  | <input type="checkbox"/> | <input type="checkbox"/> | <input type="checkbox"/> | <input type="checkbox"/> | <input type="checkbox"/> | <input type="checkbox"/> |
| In the past year?  | <input type="checkbox"/> | <input type="checkbox"/> | <input type="checkbox"/> | <input type="checkbox"/> | <input type="checkbox"/> | <input type="checkbox"/> |
| In the past month? | <input type="checkbox"/> | <input type="checkbox"/> | <input type="checkbox"/> | <input type="checkbox"/> | <input type="checkbox"/> | <input type="checkbox"/> |

**7. Has your drinking ever caused you to:**

|                                                         | Never                    | 1-2 times                | 3-5 times                | 6-9 times                | ≥10 times                |
|---------------------------------------------------------|--------------------------|--------------------------|--------------------------|--------------------------|--------------------------|
| a. Get behind in your work                              | <input type="checkbox"/> | <input type="checkbox"/> | <input type="checkbox"/> | <input type="checkbox"/> | <input type="checkbox"/> |
| b. Call in sick or be late                              | <input type="checkbox"/> | <input type="checkbox"/> | <input type="checkbox"/> | <input type="checkbox"/> | <input type="checkbox"/> |
| c. Have trouble getting along with people               | <input type="checkbox"/> | <input type="checkbox"/> | <input type="checkbox"/> | <input type="checkbox"/> | <input type="checkbox"/> |
| d. Worry that you might be using too much or too often  | <input type="checkbox"/> | <input type="checkbox"/> | <input type="checkbox"/> | <input type="checkbox"/> | <input type="checkbox"/> |
| e. Seriously consider suicide                           | <input type="checkbox"/> | <input type="checkbox"/> | <input type="checkbox"/> | <input type="checkbox"/> | <input type="checkbox"/> |
| f. Have an auto accident or other type of accident      | <input type="checkbox"/> | <input type="checkbox"/> | <input type="checkbox"/> | <input type="checkbox"/> | <input type="checkbox"/> |
| g. Provide less than your best patient care performance | <input type="checkbox"/> | <input type="checkbox"/> | <input type="checkbox"/> | <input type="checkbox"/> | <input type="checkbox"/> |
| h. See a psychiatrist, psychologist or a counselor      | <input type="checkbox"/> | <input type="checkbox"/> | <input type="checkbox"/> | <input type="checkbox"/> | <input type="checkbox"/> |

# Health Professional Questionnaire 2010

## Section: C

How many times, if ever, have you used following medications/drugs on your own authorization or for use other than intended?

| 1. Minor opiates (eg: codeine cough syrups) |                          |                          |                          |                          |                          |                          |
|---------------------------------------------|--------------------------|--------------------------|--------------------------|--------------------------|--------------------------|--------------------------|
|                                             | TIMES                    |                          |                          |                          |                          |                          |
|                                             | 0                        | 1-4                      | 5-10                     | 11-19                    | 20-30                    | >30                      |
| In your lifetime?                           | <input type="checkbox"/> | <input type="checkbox"/> | <input type="checkbox"/> | <input type="checkbox"/> | <input type="checkbox"/> | <input type="checkbox"/> |
| In the past year?                           | <input type="checkbox"/> | <input type="checkbox"/> | <input type="checkbox"/> | <input type="checkbox"/> | <input type="checkbox"/> | <input type="checkbox"/> |
| In the past month?                          | <input type="checkbox"/> | <input type="checkbox"/> | <input type="checkbox"/> | <input type="checkbox"/> | <input type="checkbox"/> | <input type="checkbox"/> |

| 2. Major opiates (eg: Fentanyl, Morphine) |                          |                          |                          |                          |                          |                          |
|-------------------------------------------|--------------------------|--------------------------|--------------------------|--------------------------|--------------------------|--------------------------|
|                                           | TIMES                    |                          |                          |                          |                          |                          |
|                                           | 0                        | 1-4                      | 5-10                     | 11-19                    | 20-30                    | >30                      |
| In your lifetime?                         | <input type="checkbox"/> | <input type="checkbox"/> | <input type="checkbox"/> | <input type="checkbox"/> | <input type="checkbox"/> | <input type="checkbox"/> |
| In the past year?                         | <input type="checkbox"/> | <input type="checkbox"/> | <input type="checkbox"/> | <input type="checkbox"/> | <input type="checkbox"/> | <input type="checkbox"/> |
| In the past month?                        | <input type="checkbox"/> | <input type="checkbox"/> | <input type="checkbox"/> | <input type="checkbox"/> | <input type="checkbox"/> | <input type="checkbox"/> |

| 3. Stimulants (eg: Methamphetamine) |                          |                          |                          |                          |                          |                          |
|-------------------------------------|--------------------------|--------------------------|--------------------------|--------------------------|--------------------------|--------------------------|
|                                     | TIMES                    |                          |                          |                          |                          |                          |
|                                     | 0                        | 1-4                      | 5-10                     | 11-19                    | 20-30                    | >30                      |
| In your lifetime?                   | <input type="checkbox"/> | <input type="checkbox"/> | <input type="checkbox"/> | <input type="checkbox"/> | <input type="checkbox"/> | <input type="checkbox"/> |
| In the past year?                   | <input type="checkbox"/> | <input type="checkbox"/> | <input type="checkbox"/> | <input type="checkbox"/> | <input type="checkbox"/> | <input type="checkbox"/> |
| In the past month?                  | <input type="checkbox"/> | <input type="checkbox"/> | <input type="checkbox"/> | <input type="checkbox"/> | <input type="checkbox"/> | <input type="checkbox"/> |

| 4. Sedative-hypnotics (eg: Temazepam, Flurazepam, Zolpidem) |                          |                          |                          |                          |                          |                          |
|-------------------------------------------------------------|--------------------------|--------------------------|--------------------------|--------------------------|--------------------------|--------------------------|
|                                                             | TIMES                    |                          |                          |                          |                          |                          |
|                                                             | 0                        | 1-4                      | 5-10                     | 11-19                    | 20-30                    | >30                      |
| In your lifetime?                                           | <input type="checkbox"/> | <input type="checkbox"/> | <input type="checkbox"/> | <input type="checkbox"/> | <input type="checkbox"/> | <input type="checkbox"/> |
| In the past year?                                           | <input type="checkbox"/> | <input type="checkbox"/> | <input type="checkbox"/> | <input type="checkbox"/> | <input type="checkbox"/> | <input type="checkbox"/> |
| In the past month?                                          | <input type="checkbox"/> | <input type="checkbox"/> | <input type="checkbox"/> | <input type="checkbox"/> | <input type="checkbox"/> | <input type="checkbox"/> |

| 5. Tranquilizers (eg: Phenobarbital, Ketamine) |                          |                          |                          |                          |                          |                          |
|------------------------------------------------|--------------------------|--------------------------|--------------------------|--------------------------|--------------------------|--------------------------|
|                                                | TIMES                    |                          |                          |                          |                          |                          |
|                                                | 0                        | 1-4                      | 5-10                     | 11-19                    | 20-30                    | >30                      |
| In your lifetime?                              | <input type="checkbox"/> | <input type="checkbox"/> | <input type="checkbox"/> | <input type="checkbox"/> | <input type="checkbox"/> | <input type="checkbox"/> |
| In the past year?                              | <input type="checkbox"/> | <input type="checkbox"/> | <input type="checkbox"/> | <input type="checkbox"/> | <input type="checkbox"/> | <input type="checkbox"/> |
| In the past month?                             | <input type="checkbox"/> | <input type="checkbox"/> | <input type="checkbox"/> | <input type="checkbox"/> | <input type="checkbox"/> | <input type="checkbox"/> |

| 6. Anxiolytics (Diazepam, Lorazepam, Alprazolam) |                          |                          |                          |                          |                          |                          |
|--------------------------------------------------|--------------------------|--------------------------|--------------------------|--------------------------|--------------------------|--------------------------|
|                                                  | TIMES                    |                          |                          |                          |                          |                          |
|                                                  | 0                        | 1-4                      | 5-10                     | 11-19                    | 20-30                    | >30                      |
| In your lifetime?                                | <input type="checkbox"/> | <input type="checkbox"/> | <input type="checkbox"/> | <input type="checkbox"/> | <input type="checkbox"/> | <input type="checkbox"/> |
| In the past year?                                | <input type="checkbox"/> | <input type="checkbox"/> | <input type="checkbox"/> | <input type="checkbox"/> | <input type="checkbox"/> | <input type="checkbox"/> |
| In the past month?                               | <input type="checkbox"/> | <input type="checkbox"/> | <input type="checkbox"/> | <input type="checkbox"/> | <input type="checkbox"/> | <input type="checkbox"/> |

| 7. Other prescription pain medications (eg: Tramadol, Pentazocine) |                          |                          |                          |                          |                          |                          |
|--------------------------------------------------------------------|--------------------------|--------------------------|--------------------------|--------------------------|--------------------------|--------------------------|
|                                                                    | TIMES                    |                          |                          |                          |                          |                          |
|                                                                    | 0                        | 1-4                      | 5-10                     | 11-19                    | 20-30                    | >30                      |
| In your lifetime?                                                  | <input type="checkbox"/> | <input type="checkbox"/> | <input type="checkbox"/> | <input type="checkbox"/> | <input type="checkbox"/> | <input type="checkbox"/> |
| In the past year?                                                  | <input type="checkbox"/> | <input type="checkbox"/> | <input type="checkbox"/> | <input type="checkbox"/> | <input type="checkbox"/> | <input type="checkbox"/> |
| In the past month?                                                 | <input type="checkbox"/> | <input type="checkbox"/> | <input type="checkbox"/> | <input type="checkbox"/> | <input type="checkbox"/> | <input type="checkbox"/> |

| 8. If use is >0 any of the questions from 1-7 above then..... please indicate reasons for use (answer all that apply): |                                                  |
|------------------------------------------------------------------------------------------------------------------------|--------------------------------------------------|
| <input type="checkbox"/>                                                                                               | Supervising self for medical condition           |
| <input type="checkbox"/>                                                                                               | For pleasure, curiosity or go along with friends |
| <input type="checkbox"/>                                                                                               | To stay awake, perform better, lose weight etc   |
| <input type="checkbox"/>                                                                                               | Don't want to, or can't quit using               |
| <input type="checkbox"/>                                                                                               | Originally prescribed but now using on my own    |

| 9. Has your drug use ever caused you to:                | Never                    | 1-2 times                | 3-5 times                | 6-9 times                | ≥10 times                |
|---------------------------------------------------------|--------------------------|--------------------------|--------------------------|--------------------------|--------------------------|
| a. Get behind in your work                              | <input type="checkbox"/> | <input type="checkbox"/> | <input type="checkbox"/> | <input type="checkbox"/> | <input type="checkbox"/> |
| b. Call in sick or be late                              | <input type="checkbox"/> | <input type="checkbox"/> | <input type="checkbox"/> | <input type="checkbox"/> | <input type="checkbox"/> |
| c. Have trouble getting along with people               | <input type="checkbox"/> | <input type="checkbox"/> | <input type="checkbox"/> | <input type="checkbox"/> | <input type="checkbox"/> |
| d. Worry that you might be using too much or too often  | <input type="checkbox"/> | <input type="checkbox"/> | <input type="checkbox"/> | <input type="checkbox"/> | <input type="checkbox"/> |
| e. Seriously consider suicide                           | <input type="checkbox"/> | <input type="checkbox"/> | <input type="checkbox"/> | <input type="checkbox"/> | <input type="checkbox"/> |
| f. Have an auto accident or other type of accident      | <input type="checkbox"/> | <input type="checkbox"/> | <input type="checkbox"/> | <input type="checkbox"/> | <input type="checkbox"/> |
| g. Provide less than your best patient care performance | <input type="checkbox"/> | <input type="checkbox"/> | <input type="checkbox"/> | <input type="checkbox"/> | <input type="checkbox"/> |
| h. See a psychiatrist, psychologist or a counselor      | <input type="checkbox"/> | <input type="checkbox"/> | <input type="checkbox"/> | <input type="checkbox"/> | <input type="checkbox"/> |

| 10. Do you feel that you have ever used alcohol and other medications/drugs <u>more than</u> you would consider appropriate? |                                       |
|------------------------------------------------------------------------------------------------------------------------------|---------------------------------------|
| <input type="checkbox"/>                                                                                                     | No                                    |
| <input type="checkbox"/>                                                                                                     | Yes, Alcohol                          |
| <input type="checkbox"/>                                                                                                     | Yes, Medications/drug use             |
| <input type="checkbox"/>                                                                                                     | Yes, Alcohol and Medications/drug use |

**Thank you very much for your participation in the study**
